# Supplementary material for: Enzyme-Mediated Quenching of the Pseudomonas Quinolone Signal (PQS): A Comparison between Naturally Occurring and Engineered PQS-Cleaving Dioxygenases
Source: MDPI journal article supplement (doi:10.3390/biom12020170), 2022-01-21
Supplement: s1 [file s1]

Supplementary Material to:

Enzyme-mediated quenching of the *Pseudomonas* quinolone signal (PQS): a comparison between naturally occurring and engineered PQS-cleaving dioxygenases

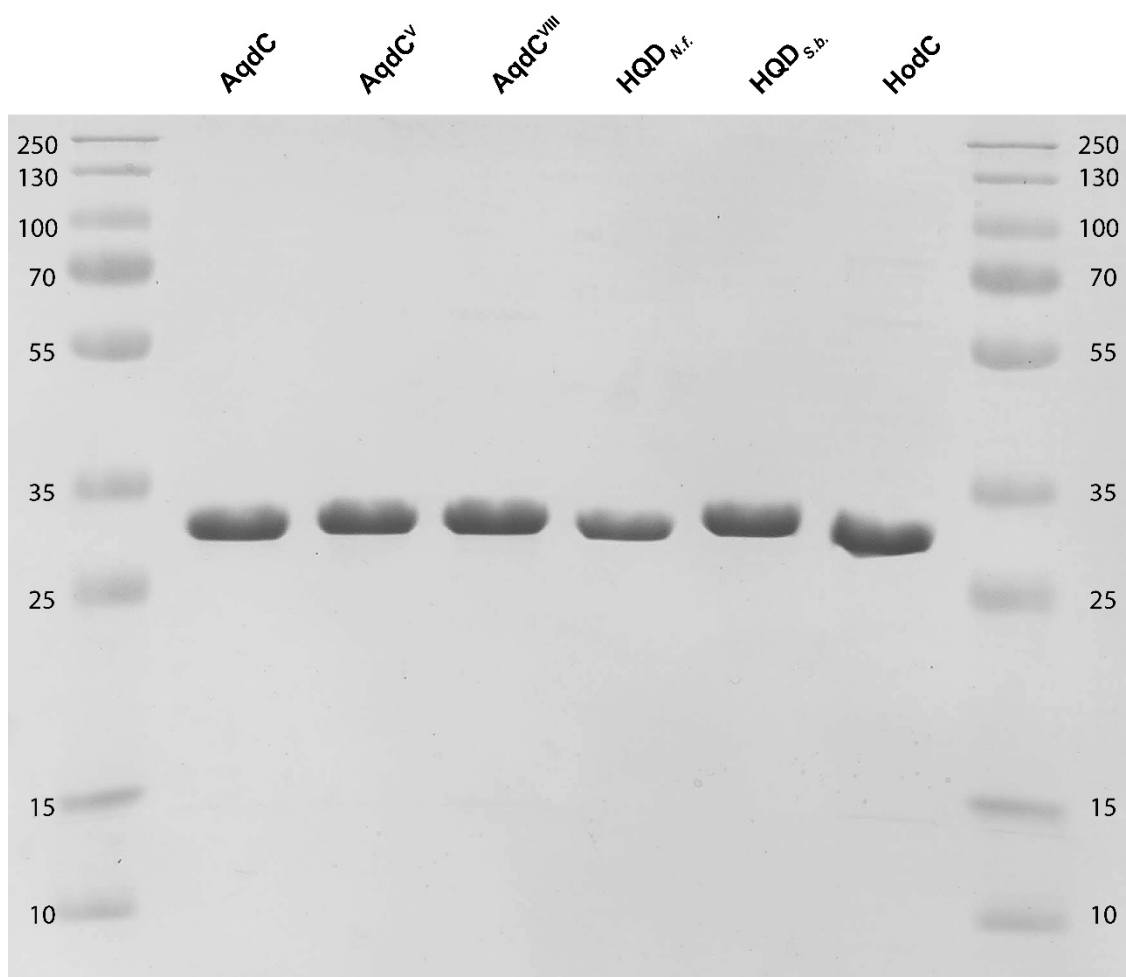

**Figure S1.** Purified HQD proteins. SDS-PAGE (12.5%) of recombinant proteins (4  $\mu$ g) purified by affinity chromatography. Gels were stained with Coomassie Blue and PageRuler™ Plus Prestained Protein Ladder (Thermo Scientific) was used as a marker.

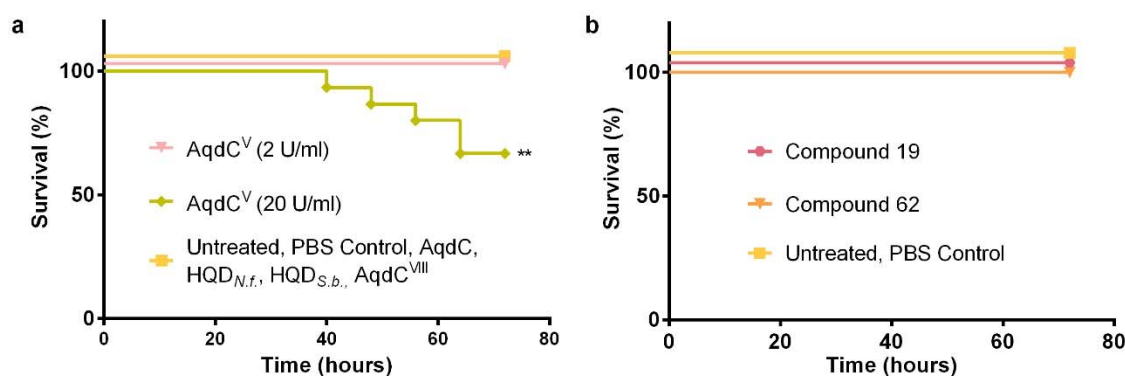

**Figure S2.** Effect of (a) PQS dioxygenases, and (b) PqsD inhibitors on survival of *G. mellonella* larvae. (a): Larvae were injected with 10  $\mu$ L of HQD enzymes at a concentration of 20 U/mL (HQD<sub>N.f.</sub>, HQD<sub>S.b.</sub>, AqdC, AqdC<sup>V</sup> and AqdC<sup>VIII</sup>) (yellow square and green diamond). The dioxygenase AqdC<sup>V</sup> was also injected at a concentration of 2 U/mL (pink triangle). (b): 10  $\mu$ L of PqsD inhibitors 19 or 62 (100  $\mu$ M) were injected. (a) and (b): Untreated larvae and larvae injected with the equivalent volume of PBS were included as control. After inoculation, larvae were incubated at 30°C in the dark and monitored every 8 hours over an 80h period. For clarity, results of the HQD dioxygenases treatments with the same outcome (a, yellow square) are not depicted individually.

**Table S1.** Kinetic parameters of HQDs for 2-heptyl-3-hydroxy-4(1*H*)-quinolone (PQS). Results are represented as mean  $\pm$  SD.

| Enzyme               | Specific activity<br>(U/mg) | $k_{cat}$ (s <sup>-1</sup> ) | $K_M$ ( $\mu$ M) | $k_{cat}/K_M$  | Reference |
|----------------------|-----------------------------|------------------------------|------------------|----------------|-----------|
| HodC                 | 0.2                         | 0.16                         | 13.4             | 0.01           | [15]      |
| AqdC                 | 60.2 $\pm$ 2.2              | 41.9 $\pm$ 1.1               | 5.8 $\pm$ 0.4    | 7.3 $\pm$ 0.6  | [14]      |
| AqdC <sup>V</sup>    | 13.1 $\pm$ 0.2              | 15.9 $\pm$ 1.0               | 22.1 $\pm$ 4.1   | 0.7 $\pm$ 0.1  | [19]      |
| AqdC <sup>VIII</sup> | 43.5 $\pm$ 4.7              | 27.0 $\pm$ 2.8               | 3.7 $\pm$ 0.3    | 7.4 $\pm$ 0.1  | [19]      |
| HQD <sub>N.f.</sub>  | 73.2 $\pm$ 2.8              | 43.9 $\pm$ 1.5               | 3.1 $\pm$ 0.4    | 14.1 $\pm$ 1.8 | [14]      |
| HQD <sub>S.b.</sub>  | 34.1 $\pm$ 2.3              | 27.4 $\pm$ 2.3               | 2.7 $\pm$ 0.9    | 9.3 $\pm$ 1.1  | [14]      |
